# Supplementary material for: Optimizing Inter-Professional Communications in Surgery: Protocol for a Mixed-Methods Exploratory Study
Source: PubMed Central journal article supplement (PMC4376151; doi:10.2196/resprot.3623), 2015-03-05
Supplement: resprot_v4i1e8_app1.pdf [file resprot_v4i1e8_app1.pdf]

**Appendix 1: Assessment of Pages Communication Priority based on the Institutional Escalation Response Time Clinical Practice Guideline (Sunnybrook Health Sciences Centre)**

| Communication Priority   | Approximate call-back time range | Definition                                                                                                                                                                                                                                                                                         | Examples                                                                                                                                                                                                                                                                                                  |
|--------------------------|----------------------------------|----------------------------------------------------------------------------------------------------------------------------------------------------------------------------------------------------------------------------------------------------------------------------------------------------|-----------------------------------------------------------------------------------------------------------------------------------------------------------------------------------------------------------------------------------------------------------------------------------------------------------|
| Low                      | > 25 minutes                     | <p>Medical intervention can occur after <b><u>more than 120 minutes</u></b> without harm for the patient.</p> <p>1. Less important and time sensitive; AND</p> <p>2. Medical intervention should likely occur within the <b><u>next 120 minutes</u></b> or serious harm may result to patient.</p> | <p>New requirement for Oxygen to maintain Oxygen saturation or resolve dyspnea</p>                                                                                                                                                                                                                        |
| Medium                   | 15-25 minutes                    | <p>1. Urgent and important; AND</p> <p>2. Medical intervention should likely occur within the <b><u>next 30 minutes</u></b> or serious harm may result to patient.</p>                                                                                                                             | <p>New confusion or agitation</p> <p>New bleeding (non-brisk) with normal vital signs e.g. from a wound</p> <p>Uncontrolled pain despite using existing orders for pain management</p> <p>Altered vital signs</p> <p>New onset chest pain or difficulty breathing unresolved with supplemental oxygen</p> |
| High                     | 5-15 minutes                     | <p>1. Urgent and important; AND</p> <p>2. <b><u>Immediate medical intervention</u></b> should likely occur or serious harm or death may occur.</p>                                                                                                                                                 | <p>New alteration of consciousness</p> <p>Brisk bleeding or bleeding with altered vital signs e.g. from a wound</p> <p>Rapid Response Team</p> <p>Code Blue (adult cardiac arrest)</p> <p>Code Blue Child</p> <p>Code Pink (pediatric cardiac arrest)</p> <p>Code Omega (massive</p>                      |
| Immediate Emergency Code |                                  |                                                                                                                                                                                                                                                                                                    |                                                                                                                                                                                                                                                                                                           |

transfusion protocol)
